# Supplementary material for: MDM2’s dual mRNA binding domains co-ordinate its oncogenic and tumour suppressor activities
Source: PubMed Central journal article supplement (PMC7337897; doi:10.1093/nar/gkaa431), 2020-05-26
Supplement: gkaa431_supplemental_file.pdf [file gkaa431_supplemental_file.pdf]

## Supplementary Figure S1

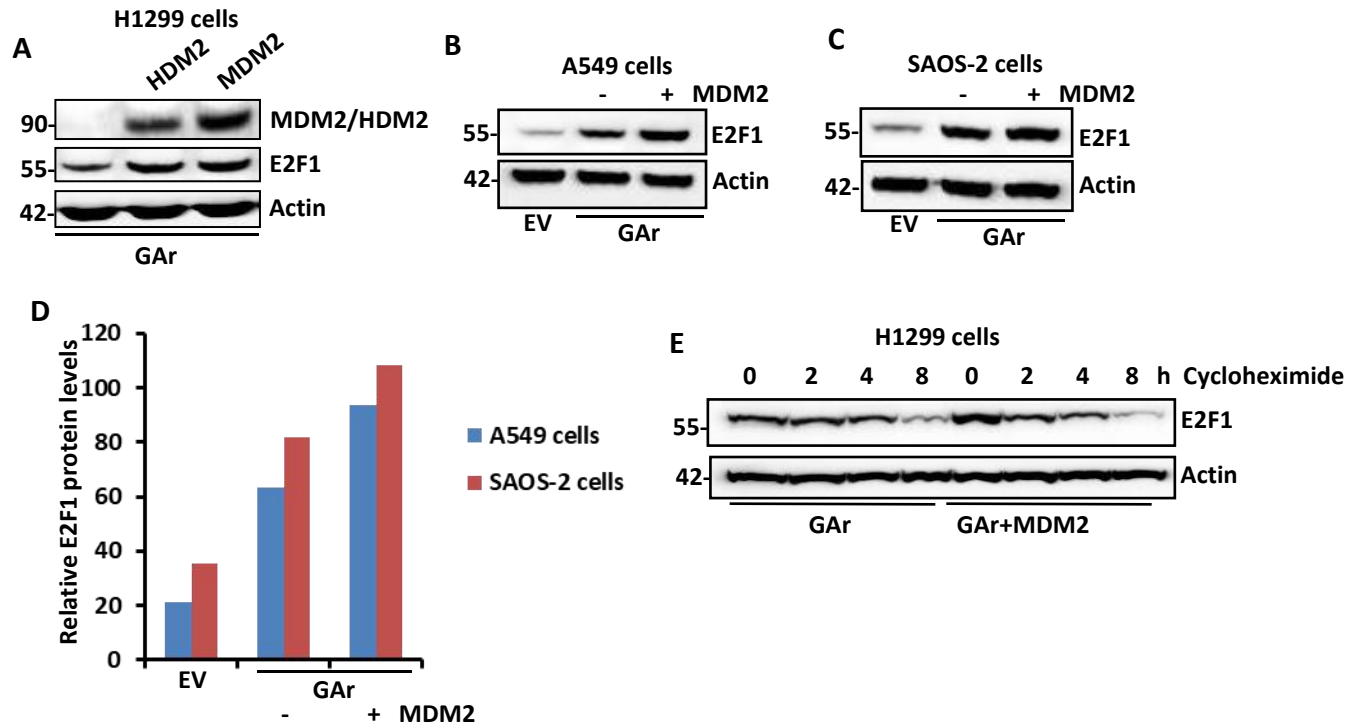

**Supplementary Figure S1.** MDM2 regulates E2F1 levels during mRNA translation stress. A) Western blot showing E2F1 levels during mRNA translation stress with over-expression of MDM2 (mouse) and HDM2 (human). B and C) Western blots showing E2F1 levels in normal (EV) and mRNA translation stress (GAr) induced cells with over-expression of MDM2 in B) A549 cells (p53 wild type) and c) SAOS-2 cells (p53 null). D) The graph shows the quantification of E2F1 protein levels from B and C. E) Western blot showing the E2F1 levels at indicated time points following Cycloheximide treatment (data relates to Figure 1F graph).

## Supplementary Figure S2

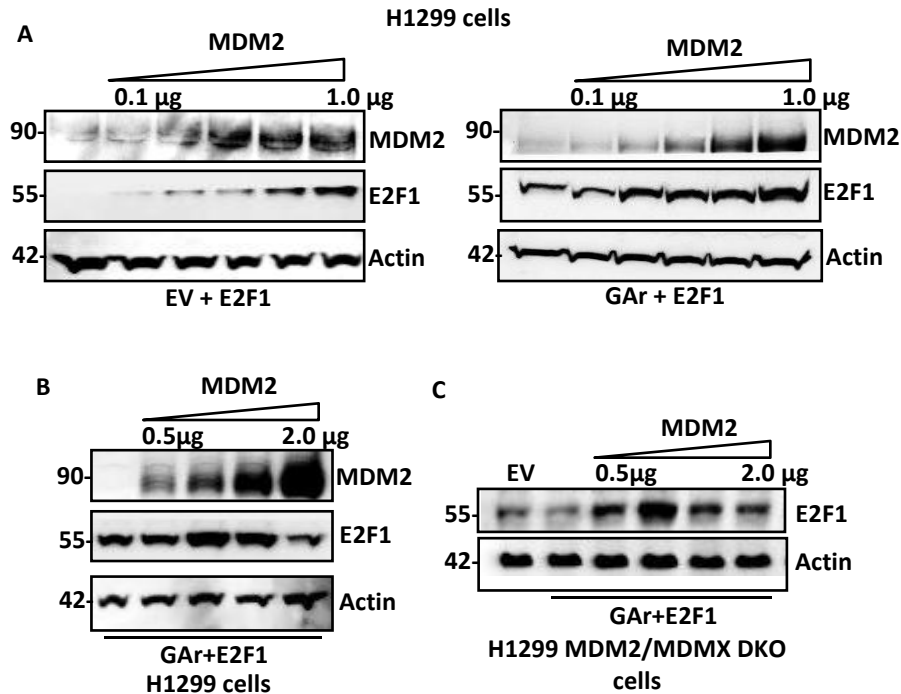

**Supplementary Figure S2.** A) Western blots showing the dose dependent effect of MDM2 (up to 1  $\mu$ g) on E2F1 levels in cells expressing the GAR (right) as compared to empty vector (EV) transfected (left). B) and C) Western blots showing the dose dependent effect of MDM2 (up to 2  $\mu$ g) on E2F1 levels during translation stress in H1299 cells (B) and MDM2/MDMX double KO (DKO) H1299 cells (C). E2F1 levels are reduced at higher concentration of MDM2 (data related to Figure 1c).

## Supplementary Figure S3

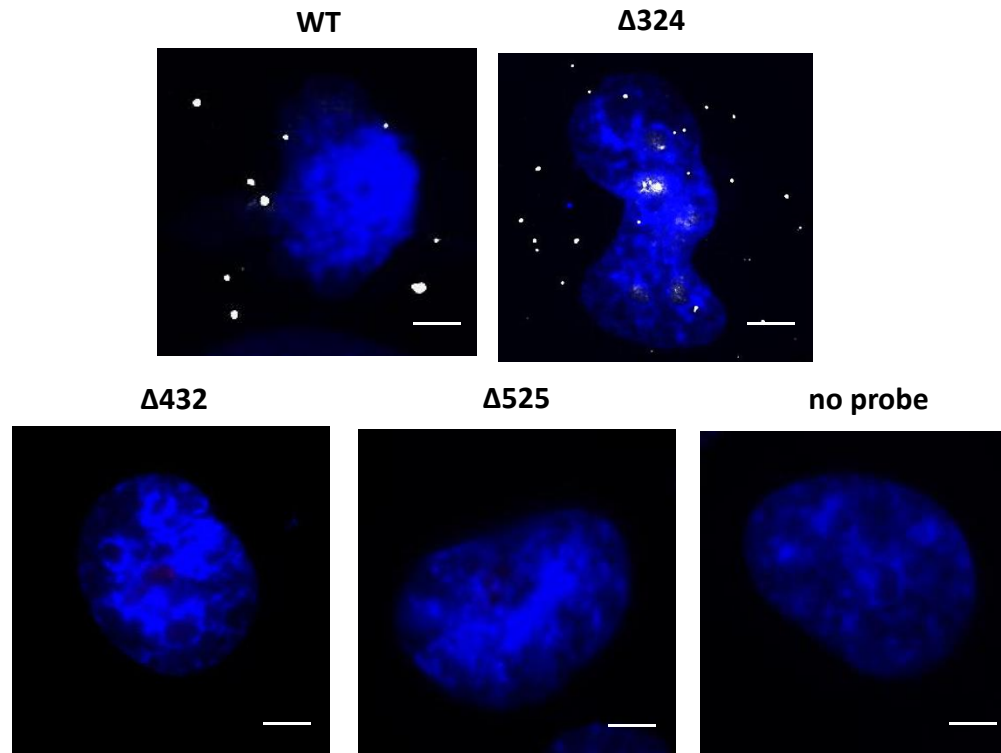

**Supplementary Figure S3.** Proximity ligation assay (PLA) showing the *in situ* interactions of MDM2 protein - *E2F1* mRNA with indicated E2F1 constructs (E2F1-WT, E2F1- $\Delta 324$ , E2F1- $\Delta 432$  and E2F1- $\Delta 525$ ) under translation stress conditions. PLA without *E2F1* RNA probe (no probe) was used as a negative control. (Data related to quantification shown in Figure 2D). Scale bar 10  $\mu\text{m}$

# Supplementary Figure S4

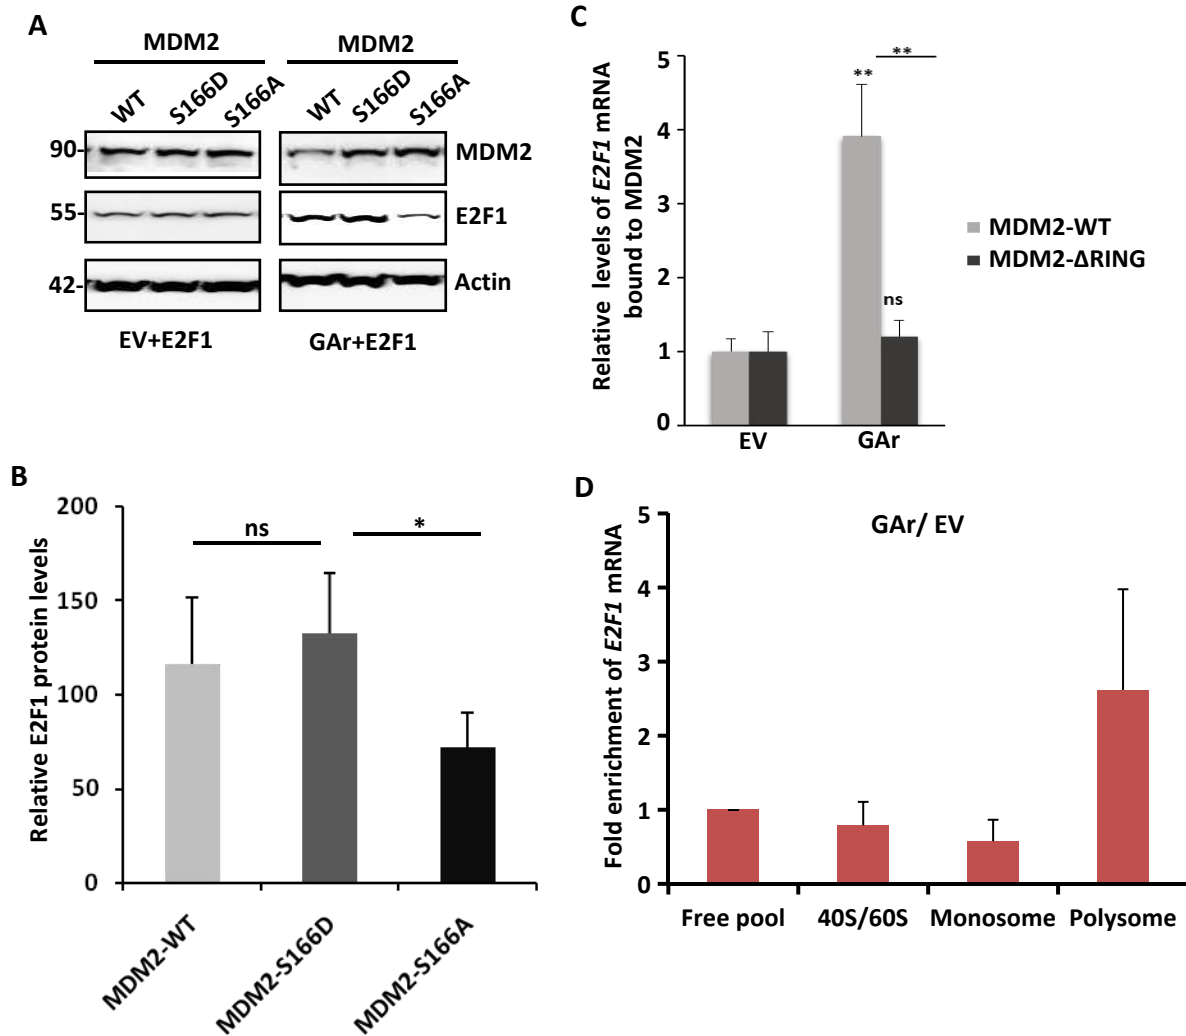

**Supplementary Figure S4.** A) Western blots showing E2F1 levels upon over-expressing MDM2-WT and phosphomutants (S166D, S166A) under normal (EV) and translation stress conditions (GAR) (data related to Figure 3a). B) Quantification of E2F1 protein levels with over-expression of MDM2-WT, MDM2-S166D, MDM2-S166A C) Graph showing the fold enrichment of *E2F1* mRNA interaction with MDM2-WT and MDM2-ΔRING proteins under normal (EV) and translation stress conditions (GAR) (data related to Figure 3E). D) RT-qPCR analysis of *E2F1* mRNA from corresponding sucrose fractions (Figure 3F), fold enrichment of *E2F1* mRNA in translation stress conditions versus control (EV) was plotted (data related to Figure 3G). Statistical significance was calculated using t-tests (\*\*\*p < 0.001, \*\*p < 0.01 and \*p < 0.05).

## Supplementary Figure S5

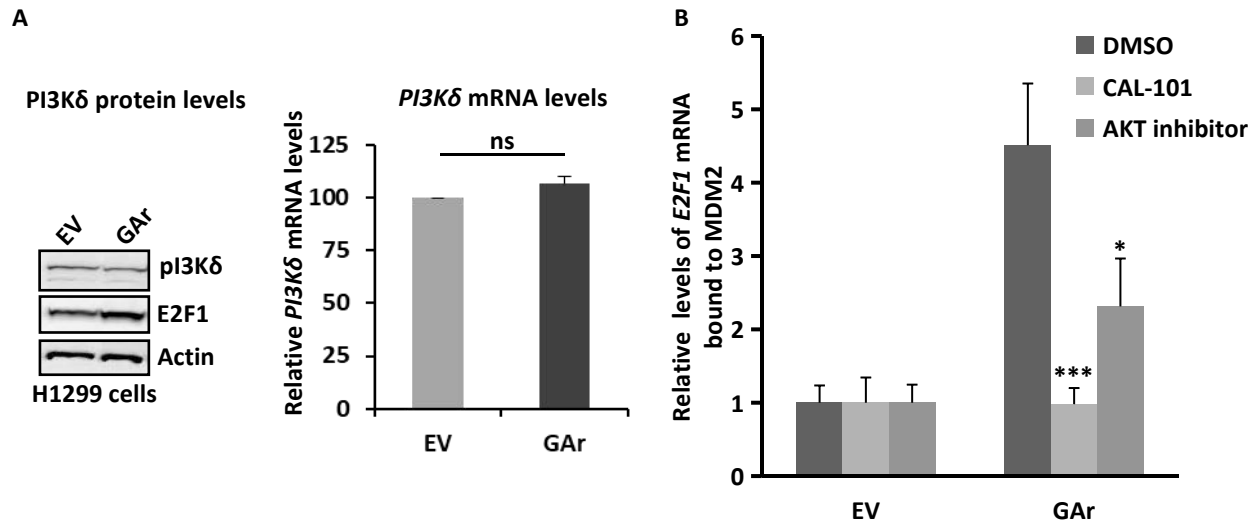

**Supplementary Figure S5.** A) Left panel; Western blot showing the protein levels of PI3K $\delta$ , right panel; Graph showing the mRNA levels of PI3K $\delta$ , under normal (EV) and translations stress conditions (GAr) in H1299 cells. Values were normalized with actin levels and are representative of three independent experiments. B) Graph showing the fold enrichment of E2F1 mRNA bound to MDM2 after RNA co-IP with purified MDM2 proteins in cells treated with CAL-101 and AKT inhibitor (Ipatasertib), data related to Figure 4E. Statistical significance was calculated using t-tests (\*\*\* $p < 0.001$ , \*\* $p < 0.01$  and \* $p < 0.05$ , ns- not significant).

## Supplementary Figure S6

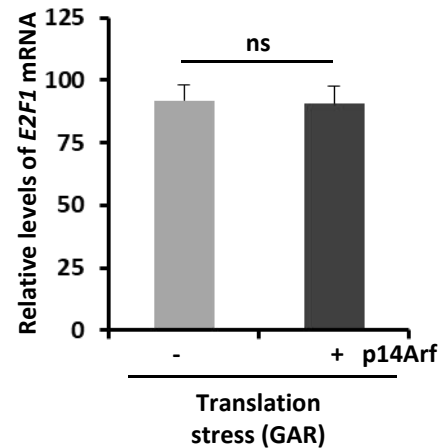

**Supplementary Figure S6.** Graph showing the mRNA levels of *E2F1*, under translations stress conditions (GAR) in U2OS cells with over-expression, or not, of tumour suppressor protein p14Arf. Values were normalized with actin levels and are representative of three independent experiments. Statistical significance was calculated using t-tests (\*\* $p < 0.001$ , \*\* $p < 0.01$  and \* $p < 0.05$ , ns- not significant).

**Supplementary Table 1**

| <b>Oligo</b>     | <b>Sequence (5'-3')</b>               | <b>Description</b> |
|------------------|---------------------------------------|--------------------|
| E2F1_F           | AGGTCACCTTCTGAGGAGGAGA                | For RT-qPCR        |
| E2F1_R           | ACAACAGCGGTTCTTGCTCCA                 | For RT-qPCR        |
| E2F1 PLA probe   | TTCTCCTCCTCAGAAGTGACCTCCTGAAAA        | For PLA            |
| c-Myc-F          | AACCAGAGTTTCATCTGCGACCCG              | For RT-qPCR        |
| c-Myc-R          | TTGTGCTGATGTGTGGAGACGTGG              | For RT-qPCR        |
| Cyclin E-F       | GTTATAAGGGAGACGGGGAG                  | For RT-qPCR        |
| Cyclin E-R       | TGCTCTGCTTCTTACCGCTC                  | For RT-qPCR        |
| 45S pre-rRNA-F   | GCTGACACGCTGTCTCTG                    | For RT-qPCR        |
| 45S pre-rRNA-R   | ACGCGCAGAGAACAGCAG                    | For RT-qPCR        |
| p21-F            | CCTCAAATCGTCCAGCGACCTT                | For RT-qPCR        |
| p21-R            | CATTGTGGGAGGAGCTGTGAAA                | For RT-qPCR        |
| p53-F            | TGGGCTTCTTGCACTTCTG                   | For RT-qPCR        |
| p53-R            | GCTGTGACTGCTTGATAGTGGC                | For RT-qPCR        |
| PI3K_F           | ATCCTCGCCATGCGGGATGA                  | For RT-qPCR        |
| PI3K_R           | TGCACCACCAGCTTCATC                    | For RT-qPCR        |
| $\beta$ -Actin_F | TCACCCACACTGTGCCCATCTACGA             | For RT-qPCR        |
| $\beta$ -Actin_R | TGAGGTAGTCAGTCAGGTCCCG                | For RT-qPCR        |
| MDM2_S166A_F     | CTAGAAGGAGAGCAATTGCTGAGACAGAAGAAAATTC | mutagenesis        |
| MDM2_S166A_R     | GAATTTTCTTCTGTCTCAGCAATTGCTCTCCTTCTAG | mutagenesis        |
| MDM2_S166D_F     | CTAGAAGGAGAGCAATTGATGAGACAGAAGAAAATTC | mutagenesis        |
| MDM2_S166D_R     | GAATTTTCTTCTGTCTCATCAATTGCTCTCCTTCTAG | mutagenesis        |
